# Supplementary material
Source: MDPI journal article supplement (https://www.mdpi.com/1424-2818/13/12/623)
Supplement: s1 [file s1]

## Supplementary Materials

**Table S1:** Reference list of used layers from Copernicus Land Monitoring Service © and maps created in ArcMap to form the landscape models for the analysis of *Bombina variegata* in the northern Weser Hills.

| Landscape Category and Type                                                              | Source                                                                                                                                                                                                                                                                                             | Land Cover/ Land Use                                                                |
|------------------------------------------------------------------------------------------|----------------------------------------------------------------------------------------------------------------------------------------------------------------------------------------------------------------------------------------------------------------------------------------------------|-------------------------------------------------------------------------------------|
| <i>Forest</i><br>type, status map 2015,<br>resolution 20x20 m,<br>version 04             | URL: <a href="https://land.copernicus.eu/pan-european/high-resolution-layers/forests/forest-type-1/status-maps/2015">https://land.copernicus.eu/pan-european/high-resolution-layers/forests/forest-type-1/status-maps/2015</a><br>[Download: 01.06.2020] Tile: E40N30                              | Forest free areas<br>Broadleaf/ Coniferous forest                                   |
| <i>Grassland</i><br>status map 2018,<br>resolution 10x10 m,<br>version 01                | URL: <a href="https://land.copernicus.eu/pan-european/high-resolution-layers/grassland/status-maps/grassland-2018">https://land.copernicus.eu/pan-european/high-resolution-layers/grassland/status-maps/grassland-2018</a> [Download: 01.06.2020] Tile: E40N30                                     | Grassland free areas<br>Grassland                                                   |
| <i>Water &amp; Wetness</i><br>status map 2018,<br>resolution 10x10 m,<br>version 011     | URL: <a href="https://land.copernicus.eu/pan-european/high-resolution-layers/water-wetness/status-maps/water-wetness-2018">https://land.copernicus.eu/pan-european/high-resolution-layers/water-wetness/status-maps/water-wetness-2018</a> [Download: 01.06.2020] Tile: E40N30                     | Dry<br>Permanent waterbody<br>Temporary waterbody<br>Permanent wet<br>Temporary wet |
| <i>Imperviousness</i><br>density, status map 2018,<br>resolution 10x10 m,<br>version 020 | URL: <a href="https://land.copernicus.eu/pan-european/high-resolution-layers/imperviousness/status-maps/imperviousness-density-2018">https://land.copernicus.eu/pan-european/high-resolution-layers/imperviousness/status-maps/imperviousness-density-2018</a> [Download: 01.06.2020] Tile: E40N30 | Continuous raster ranging from 0 to 100 %<br>imperviousness                         |
| <i>Agricultural Land</i><br>raster layer,<br>resolution 10x10 m                          | ArcMap version 10.5.1 by ESRI ©<br>Basemap © Google Maps                                                                                                                                                                                                                                           | Agricultural Land<br>No Agricultural Land                                           |
| <i>Motorway A2 and Underpasses</i><br>polygon,<br>resolution 10x10 m,                    | ArcMap version 10.5.1 by ESRI ©<br>Basemap © Google Maps                                                                                                                                                                                                                                           | Motorway A2<br>Underpasses                                                          |

**Table S2:** Summary statistics for the used microsatellite markers (loci), averaged across all study sites. Number of detected alleles, expected heterozygosity (“He”), observed heterozygosity (“Ho”), size range of each loci in base pairs, allelic richness of each loci and confidence interval (“CI”). “Tetra” and “di” refers to the number of repeats (tetranucleotide or dinucleotide). 10 loci in 440 *Bombina variegata* individuals analysed.

| Loci        | n alleles | He           | Ho            | Size range (bp) | Allelic richness |
|-------------|-----------|--------------|---------------|-----------------|------------------|
| 1A (tetra)  | 5         | 0.11         | 0.12          | 320 – 360       | 1.17             |
| F2 (di)     | 23        | 0.85         | 0.19          | 407 – 527       | 2.77             |
| 5F (tetra)  | 14        | 0.56         | 0.4           | 88 – 164        | 2.1              |
| 8A (tetra)  | 13        | 0.79         | 0.63          | 203 – 336       | 2.46             |
| 9H (tetra)  | 13        | 0.7          | 0.58          | 142 – 206       | 2.17             |
| 10F (tetra) | 9         | 0.69         | 0.64          | 181 – 227       | 2.21             |
| 12F (tetra) | 9         | 0.63         | 0.6           | 164 – 236       | 2.13             |
| B14 (di)    | 11        | 0.61         | 0.50          | 116 – 200       | 2.09             |
| F22 (di)    | 9         | 0.09         | 0.06          | 132 – 152       | 1.19             |
| B13 (di)    | 17        | 0.39         | 0.22          | 93 – 149        | 1.83             |
| Mean        | 12.3      | 0.54         | 0.39          | x               | 2.01             |
| (95 % CI)   |           | (0.39 – 0.7) | (0.26 – 0.53) |                 | (1.72 – 2.31)    |

**Table S4:** Matrix of pairwise genetic ( $F_{ST}$  values; lower triangle) and geographic distance (km; upper triangle) among *Bombina variegata* populations in the norther Weser Hills. Divided by clusters. Fuchsloch ("FL"), Edler/Brinkmeyer ("BM"), Bokshorn ("BH"), Wülper Egge ("WE"), Messingsberg ("MB"), Schlingmühle ("SM"), Bernsen ("BE"), Liekwegen ("LI"), Waldwiese ("WW"), JBF-Wiese ("JW"), Borstel ("BO"), Rohden ("RO"), Nato-Station ("NS"), Segelhorst ("SH") and Pötzen ("PA"). \* = n < 10. † = reintroduced populations.

| Cluster    |      | G1   |      |      |      |      |      | G2   |      |      |      |      |      | G3   |      | G4   |
|------------|------|------|------|------|------|------|------|------|------|------|------|------|------|------|------|------|
| Population |      | FL   | MB   | SM   | WW   | BO   | NS   | WE†  | BE†  | LI   | JW*  | RO*† | SH*† | BM   | BH*  | PA   |
| G1         | FL   | -    | 20.1 | 29.2 | 24.2 | 23.7 | 28.8 | 20.7 | 21.9 | 24.3 | 24.1 | 27.6 | 31.2 | 8.1  | 10.5 | 38   |
|            | MB   | 0.09 | -    | 18.3 | 7.3  | 4.5  | 10.5 | 20.3 | 1.8  | 8.7  | 6.3  | 7.5  | 11.1 | 12.8 | 11.4 | 18.2 |
|            | SM   | 0.14 | 0.07 | -    | 11.5 | 15.2 | 12.2 | 12.4 | 18.2 | 9.9  | 12.9 | 18.8 | 19.8 | 25.9 | 26.1 | 26.7 |
|            | WW   | 0.09 | 0.08 | 0.09 | -    | 3.7  | 4.7  | 17   | 6.8  | 1.7  | 1.4  | 8    | 10.2 | 18.3 | 17.5 | 18   |
|            | BO   | 0.12 | 0.1  | 0.02 | 0.07 | -    | 6    | 19.8 | 3.4  | 5.4  | 2.3  | 5.1  | 8.1  | 17   | 15.7 | 15.9 |
|            | NS   | 0.09 | 0.07 | 0.06 | 0.05 | 0.04 | -    | 20.5 | 9.3  | 5.2  | 4.7  | 7.1  | 7.6  | 22.6 | 21.5 | 14.8 |
| G2         | WE†  | 0.19 | 0.12 | 0.05 | 0.12 | 0.05 | 0.06 | -    | 21.3 | 15.7 | 18.2 | 24.8 | 27.2 | 20.9 | 22.2 | 35   |
|            | BE†  | 0.14 | 0.09 | 0.02 | 0.11 | 0.06 | 0.04 | 0.06 | -    | 8.4  | 5.6  | 5.7  | 9.3  | 14.6 | 13   | 16.4 |
|            | LI   | 0.07 | 0.07 | 0.03 | 0.05 | 0.02 | 0.03 | 0.04 | 0.03 | -    | 3.1  | 9.6  | 11.6 | 18.9 | 18.3 | 19.3 |
|            | JW*  | 0.20 | 0.13 | 0.07 | 0.09 | 0.06 | 0.05 | 0.03 | 0.05 | 0.03 | -    | 6.7  | 9.2  | 17.9 | 16.9 | 17   |
|            | RO*† | 0.19 | 0.14 | 0.04 | 0.1  | 0.03 | 0.03 | 0.01 | 0.04 | 0.01 | 0.01 | -    | 3.6  | 20.2 | 18.5 | 10.9 |
|            | SH*† | 0.22 | 0.19 | 0.08 | 0.12 | 0.04 | 0.1  | 0.08 | 0.07 | 0.03 | 0.05 | 0.03 | -    | 23.8 | 22   | 7.8  |
| G3         | BM   | 0.21 | 0.17 | 0.13 | 0.12 | 0.07 | 0.09 | 0.04 | 0.14 | 0.09 | 0.09 | 0.07 | 0.1  | -    | 2.5  | 30.2 |
|            | BH*  | 0.32 | 0.2  | 0.17 | 0.15 | 0.16 | 0.1  | 0.08 | 0.15 | 0.13 | 0.13 | 0.17 | 0.22 | 0.08 | -    | 28.2 |
| G4         | PA   | 0.27 | 0.18 | 0.23 | 0.22 | 0.19 | 0.19 | 0.19 | 0.23 | 0.17 | 0.23 | 0.22 | 0.26 | 0.18 | 0.22 | -    |

**Table S5:** Mean migration rate (“m[i,j]”), the fraction of individuals in population “i” that are migrants derived from population “j” (per generation) conducted with BayesAss3. Self-migration is marked grey, the 5 % highest migration rates are in green, the lowest 5 % in pink (self-migration was excluded). Fuchsloch (“FL”), Edler/Brinkmeyer (“BM”), Bokshorn (“BH”), Wülpker Egge (“WE”), Messingsberg (“MB”), Schlingmühle (“SM”), Bernsen (“BE”), Liekwegen (“LI”), Waldwiese (“WW”), JBF-Wiese (“JW”), Borstel (“BO”), Rohden (“RO”), Nato-Station (“NS”), Segelhorst (“SH”) and Pötzen (“PA”). \* = n < 10. † = reintroduced populations.

|                 | Populations [j] |       |       |       |       |       |       |       |       |       |       |       |       |       |       |       |
|-----------------|-----------------|-------|-------|-------|-------|-------|-------|-------|-------|-------|-------|-------|-------|-------|-------|-------|
|                 |                 | FL    | BM    | BH*   | WE†   | MB    | SM    | BE†   | LI    | WW    | JW*   | BO    | RO*†  | NS    | SH*†  | PA    |
| Populations [i] | FL              | 0.679 | 0.012 | 0.013 | 0.013 | 0.054 | 0.012 | 0.013 | 0.014 | 0.012 | 0.012 | 0.113 | 0.012 | 0.016 | 0.013 | 0.014 |
|                 | BM              | 0.003 | 0.947 | 0.003 | 0.003 | 0.004 | 0.003 | 0.003 | 0.006 | 0.003 | 0.004 | 0.005 | 0.003 | 0.005 | 0.003 | 0.004 |
|                 | BH*             | 0.018 | 0.066 | 0.684 | 0.018 | 0.017 | 0.018 | 0.017 | 0.02  | 0.017 | 0.018 | 0.018 | 0.017 | 0.036 | 0.018 | 0.018 |
|                 | WE†             | 0.012 | 0.07  | 0.012 | 0.678 | 0.014 | 0.012 | 0.012 | 0.084 | 0.012 | 0.012 | 0.031 | 0.012 | 0.018 | 0.012 | 0.012 |
|                 | MB              | 0.005 | 0.007 | 0.005 | 0.006 | 0.904 | 0.005 | 0.005 | 0.01  | 0.005 | 0.005 | 0.015 | 0.006 | 0.009 | 0.005 | 0.006 |
|                 | SM              | 0.013 | 0.014 | 0.014 | 0.013 | 0.04  | 0.68  | 0.014 | 0.053 | 0.013 | 0.014 | 0.073 | 0.013 | 0.02  | 0.013 | 0.014 |
|                 | BE†             | 0.007 | 0.01  | 0.007 | 0.007 | 0.013 | 0.007 | 0.677 | 0.153 | 0.007 | 0.007 | 0.014 | 0.007 | 0.068 | 0.007 | 0.007 |
|                 | LI              | 0.003 | 0.009 | 0.009 | 0.003 | 0.076 | 0.003 | 0.003 | 0.842 | 0.003 | 0.003 | 0.013 | 0.003 | 0.033 | 0.003 | 0.003 |
|                 | WW              | 0.012 | 0.033 | 0.012 | 0.012 | 0.016 | 0.012 | 0.012 | 0.014 | 0.679 | 0.012 | 0.056 | 0.012 | 0.092 | 0.012 | 0.012 |
|                 | JW*             | 0.015 | 0.016 | 0.015 | 0.015 | 0.019 | 0.015 | 0.015 | 0.06  | 0.015 | 0.682 | 0.016 | 0.015 | 0.071 | 0.015 | 0.015 |
|                 | BO              | 0.01  | 0.032 | 0.01  | 0.011 | 0.017 | 0.01  | 0.01  | 0.057 | 0.01  | 0.01  | 0.717 | 0.01  | 0.074 | 0.011 | 0.011 |
|                 | RO*†            | 0.019 | 0.021 | 0.02  | 0.02  | 0.02  | 0.019 | 0.02  | 0.048 | 0.02  | 0.02  | 0.021 | 0.686 | 0.029 | 0.02  | 0.019 |
|                 | NS              | 0.008 | 0.033 | 0.009 | 0.009 | 0.015 | 0.009 | 0.008 | 0.024 | 0.008 | 0.009 | 0.037 | 0.009 | 0.805 | 0.008 | 0.009 |
|                 | SH*†            | 0.016 | 0.018 | 0.016 | 0.016 | 0.016 | 0.016 | 0.016 | 0.104 | 0.016 | 0.016 | 0.016 | 0.016 | 0.021 | 0.683 | 0.016 |
|                 | PA              | 0.005 | 0.005 | 0.004 | 0.004 | 0.005 | 0.005 | 0.004 | 0.005 | 0.004 | 0.004 | 0.005 | 0.004 | 0.005 | 0.004 | 0.937 |
